# Supplementary material
Source: HighWire-hosted journal article supplement (https://bmjopen.bmj.com/content/11/1/e038677)
Supplement: inline-supplementary-material-1 [file inline-supplementary-material-1.pdf]

## Supplementary Material #1

### The Gastroparesis Cardinal Symptom Index (GCSI)

GCSI score will be calculated as per Revicki 2004 (1):

#### Response scale

- (0) None
- (1) Very mild
- (2) Mild
- (3) Moderate
- (4) Severe
- (5) Very severe

#### Items

Please rate the severity of the following symptoms during the past 2 weeks:

- 1. Nausea
- 2. Retching (heaving as if to vomit, but nothing comes up)
- 3. Vomiting
- 4. Stomach fullness
- 5. Not able to finish a normal-sized meal
- 6. Feeling excessively full after meals
- 7. Loss of appetite
- 8. Bloating (feeling like you need to loosen your clothes)
- 9. Stomach or belly visibly larger

#### Calculation of GCSI-score

- 1. Nausea/vomiting-score: Average score of items 1-3
- 2. Early satiety-score: Average score of items 4-7
- 3. Bloating-score: Average score of items 8-9
- 4. GCSI-score: Average of all three sub-scores

#### References:

- 1. Revicki DA, Rentz AM, Dubois D, Kahrilas P, Stanghellini V, Talley NJ, et al. Gastroparesis Cardinal Symptom Index (GCSI): development and validation of a patient reported assessment of severity of gastroparesis symptoms. *Qual Life Res.* 2004 May;13(4):833–44.
